# Supplementary material
Source: MDPI journal article supplement (https://www.mdpi.com/2077-0472/13/7/1394)
Supplement: s1 [file s1]

## Supplementary Materials

### A. Oriental type varieties

**Supplementary Table S1:** The mean yield (kg/ha) for the Oriental type varieties, along with the 95% confidence interval, for all categories' combinations of the factors area and variety.

| Area            | Variety | Mean     | 95% Confidence Interval |             |
|-----------------|---------|----------|-------------------------|-------------|
|                 |         |          | Lower Bound             | Upper Bound |
| AITOLOAKARNANIA | DOXATO  | 1372.767 | 1173.171                | 1572.363    |
|                 | K53     | 1285.667 | 1086.071                | 1485.263    |
|                 | N34     | 1283.267 | 1083.671                | 1482.863    |
|                 | X2A     | 1118.533 | 918.937                 | 1318.129    |
|                 | X81     | 1337.567 | 1137.971                | 1537.163    |
| KARDITSA        | DOXATO  | 1284.000 | 1084.404                | 1483.596    |
|                 | K53     | 1672.100 | 1472.504                | 1871.696    |
|                 | N34     | 1078.267 | 878.671                 | 1277.863    |
|                 | X2A     | 1280.433 | 1080.837                | 1480.029    |
|                 | X81     | 1274.200 | 1074.604                | 1473.796    |
| KATERINI        | DOXATO  | 1300.700 | 1101.104                | 1500.296    |
|                 | K53     | 1979.633 | 1780.037                | 2179.229    |
|                 | N34     | 1323.267 | 1123.671                | 1522.863    |
|                 | X2A     | 1264.467 | 1064.871                | 1464.063    |
|                 | X81     | 1347.867 | 1148.271                | 1547.463    |
| SERRES          | DOXATO  | 1433.967 | 1234.371                | 1633.563    |
|                 | K53     | 1815.767 | 1616.171                | 2015.363    |
|                 | N34     | 1443.033 | 1243.437                | 1642.629    |
|                 | X2A     | 1481.133 | 1281.537                | 1680.729    |
|                 | X81     | 1520.200 | 1320.604                | 1719.796    |
| XANTHI          | DOXATO  | 1350.000 | 1150.404                | 1549.596    |
|                 | K53     | 1508.667 | 1309.071                | 1708.263    |
|                 | N34     | 1310.667 | 1111.071                | 1510.263    |
|                 | X2A     | 1550.000 | 1350.404                | 1749.596    |
|                 | X81     | 1631.667 | 1432.071                | 1831.263    |

**Supplementary Table S2:** The mean yield (kg/ha) for the Oriental type varieties, along with the 95% confidence interval, for all categories' combinations of the factors area and cultivation year.

| Area            | Cultivation year | Mean     | 95% Confidence Interval |             |
|-----------------|------------------|----------|-------------------------|-------------|
|                 |                  |          | Lower Bound             | Upper Bound |
| AITOLOAKARNANIA | 2014             | 1543.540 | 1388.934                | 1698.146    |
|                 | 2015             | 1130.000 | 975.394                 | 1284.606    |
|                 | 2016             | 1165.140 | 1010.534                | 1319.746    |
| KARDITSA        | 2014             | 1708.600 | 1553.994                | 1863.206    |
|                 | 2015             | 1163.780 | 1009.174                | 1318.386    |
|                 | 2016             | 1081.020 | 926.414                 | 1235.626    |
| KATERINI        | 2014             | 1492.140 | 1337.534                | 1646.746    |
|                 | 2015             | 1435.760 | 1281.154                | 1590.366    |
|                 | 2016             | 1401.660 | 1247.054                | 1556.266    |
| SERRES          | 2014             | 1373.860 | 1219.254                | 1528.466    |
|                 | 2015             | 1784.100 | 1629.494                | 1938.706    |
|                 | 2016             | 1458.500 | 1303.894                | 1613.106    |
| XANTHI          | 2014             | 1568.600 | 1413.994                | 1723.206    |
|                 | 2015             | 1392.800 | 1238.194                | 1547.406    |
|                 | 2016             | 1449.200 | 1294.594                | 1603.806    |

**Supplementary Table S3:** The mean yield (kg/ha) for the Oriental type varieties, along with the 95% confidence interval, for all categories' combinations of the factors variety and cultivation year.

| Variety | Cultivation year | Mean     | 95% Confidence Interval |             |
|---------|------------------|----------|-------------------------|-------------|
|         |                  |          | Lower Bound             | Upper Bound |
| DOXATO  | 2014             | 1514.500 | 1359.894                | 1669.106    |
|         | 2015             | 1261.300 | 1106.694                | 1415.906    |
|         | 2016             | 1269.060 | 1114.454                | 1423.666    |
| K53     | 2014             | 1802.640 | 1648.034                | 1957.246    |
|         | 2015             | 1582.060 | 1427.454                | 1736.666    |
|         | 2016             | 1572.400 | 1417.794                | 1727.006    |
| N34     | 2014             | 1359.040 | 1204.434                | 1513.646    |
|         | 2015             | 1360.760 | 1206.154                | 1515.366    |
|         | 2016             | 1143.300 | 988.694                 | 1297.906    |
| X2A     | 2014             | 1436.800 | 1282.194                | 1591.406    |
|         | 2015             | 1344.060 | 1189.454                | 1498.666    |
|         | 2016             | 1235.880 | 1081.274                | 1390.486    |
| X81     | 2014             | 1573.760 | 1419.154                | 1728.366    |
|         | 2015             | 1358.260 | 1203.654                | 1512.866    |
|         | 2016             | 1334.880 | 1180.274                | 1489.486    |

**Supplementary Table S4:** (A) Post hoc analysis (Tukey HSD) for the factor cultivation year (dependent Variable: Yield) for the Oriental type varieties. (B) The groups of cultivation year are displayed within the homogeneous subsets obtained by Tukey HSD for the Oriental type varieties.

(A)

| (I)<br>Cultivation<br>year | (J)<br>Cultivation<br>year | Mean<br>Difference (I-<br>J) | p-value | 95% Confidence Interval |                |
|----------------------------|----------------------------|------------------------------|---------|-------------------------|----------------|
|                            |                            |                              |         | Lower<br>Bound          | Upper<br>Bound |
| 2014                       | 2015                       | 156.060*                     | 0.007   | 38.095                  | 274.024        |
|                            | 2016                       | 226.244*                     | 0.000   | 108.279                 | 344.208        |
| 2015                       | 2014                       | -156.060*                    | 0.007   | -274.024                | -38.095        |
|                            | 2016                       | 70.184                       | 0.322   | -47.780                 | 188.148        |
| 2016                       | 2014                       | -226.244*                    | 0.000   | -344.208                | -108.279       |
|                            | 2015                       | -70.184                      | 0.322   | -188.148                | 47.780         |

\*. The mean difference is significant at the 0.05 level.

(B)

| Cultivation year | N  | Subset   |          |
|------------------|----|----------|----------|
|                  |    | 1        | 2        |
| 2016             | 25 | 1311.104 |          |
| 2015             | 25 | 1381.288 |          |
| 2014             | 25 |          | 1537.348 |
| p-value          |    | 0.322    | 1.000    |

**Supplementary Table S5:** (A) Post hoc analysis (Tukey HSD) for the factor area (dependent Variable: Yield) for the Oriental type varieties. (B) The groups of area are displayed within the homogeneous subsets obtained by Tukey HSD for the Oriental type varieties.

(A)

| (I)<br>Area     | (J)<br>Area     | Mean<br>Difference (I-<br>J) | p-value | 95% Confidence Interval |                |
|-----------------|-----------------|------------------------------|---------|-------------------------|----------------|
|                 |                 |                              |         | Lower<br>Bound          | Upper<br>Bound |
| AITOLOAKARNANIA | KARDITSA        | -38.2400                     | 0.971   | -217.305                | 140.825        |
|                 | KATERINI        | -163.6267                    | 0.087   | -342.692                | 15.438         |
|                 | SERRES          | -259.2600*                   | 0.002   | -438.325                | -80.194        |
|                 | XANTHI          | -190.6400*                   | 0.032   | -369.705                | -11.574        |
| KARDITSA        | AITOLOAKARNANIA | 38.2400                      | 0.971   | -140.825                | 217.305        |
|                 | KATERINI        | -125.3867                    | 0.278   | -304.452                | 53.678         |
|                 | SERRES          | -221.0200*                   | 0.010   | -400.085                | -41.954        |
|                 | XANTHI          | -152.4000                    | 0.126   | -331.465                | 26.665         |
| KATERINI        | AITOLOAKARNANIA | 163.6267                     | 0.087   | -15.438                 | 342.692        |
|                 | KARDITSA        | 125.3867                     | 0.278   | -53.678                 | 304.452        |
|                 | SERRES          | -95.6333                     | 0.543   | -274.698                | 83.432         |
|                 | XANTHI          | -27.0133                     | 0.992   | -206.078                | 152.052        |
| SERRES          | AITOLOAKARNANIA | 259.2600*                    | 0.002   | 80.194                  | 438.325        |
|                 | KARDITSA        | 221.0200*                    | 0.010   | 41.954                  | 400.085        |
|                 | KATERINI        | 95.6333                      | 0.543   | -83.432                 | 274.698        |
|                 | XANTHI          | 68.6200                      | 0.801   | -110.445                | 247.685        |
| XANTHI          | AITOLOAKARNANIA | 190.6400*                    | 0.032   | 11.574                  | 369.705        |
|                 | KARDITSA        | 152.4000                     | 0.126   | -26.665                 | 331.465        |
|                 | KATERINI        | 27.0133                      | 0.992   | -152.052                | 206.078        |
|                 | SERRES          | -68.6200                     | 0.801   | -247.685                | 110.445        |

\*. The mean difference is significant at the 0.05 level.

(B)

| Area            | N  | Subset   |          |          |
|-----------------|----|----------|----------|----------|
|                 |    | 1        | 2        | 3        |
| AITOLOAKARNANIA | 15 | 1279.560 |          |          |
| KARDITSA        | 15 | 1317.800 | 1317.800 |          |
| KATERINI        | 15 | 1443.186 | 1443.186 | 1443.186 |
| XANTHI          | 15 |          | 1470.200 | 1470.200 |
| SERRES          | 15 |          |          | 1538.820 |
| p-value         |    | 0.087    | 0.126    | 0.543    |

**Supplementary Table S6:** (A) Post hoc analysis (Tukey HSD) for the factor variety (dependent Variable: Yield) for the Oriental type varieties. (B) The groups of variety are displayed within the homogeneous subsets obtained by Tukey HSD for the Oriental type varieties.

(A)

| (I)<br>Variety | (J)<br>Variety | Mean<br>Difference (I-J) | p-value | 95% Confidence Interval |                |
|----------------|----------------|--------------------------|---------|-------------------------|----------------|
|                |                |                          |         | Lower<br>Bound          | Upper<br>Bound |
| DOXATO         | K53            | -304.080*                | 0.000   | -483.145                | -125.014       |
|                | N34            | 60.586                   | 0.863   | -118.478                | 239.652        |
|                | X2A            | 9.373                    | 1.000   | -169.692                | 188.438        |
|                | X81            | -74.013                  | 0.755   | -253.078                | 105.052        |
| K53            | DOXATO         | 304.080*                 | 0.000   | 125.014                 | 483.145        |
|                | N34            | 364.666*                 | 0.000   | 185.601                 | 543.732        |
|                | X2A            | 313.453*                 | 0.000   | 134.387                 | 492.518        |
|                | X81            | 230.066*                 | 0.007   | 51.001                  | 409.132        |
| N34            | DOXATO         | -60.586                  | 0.863   | -239.652                | 118.478        |
|                | K53            | -364.666*                | 0.000   | -543.732                | -185.601       |
|                | X2A            | -51.213                  | 0.920   | -230.278                | 127.852        |
|                | X81            | -134.600                 | 0.216   | -313.665                | 44.465         |
| X2A            | DOXATO         | -9.373                   | 1.000   | -188.438                | 169.692        |
|                | K53            | -313.453*                | 0.000   | -492.518                | -134.387       |
|                | N34            | 51.213                   | 0.920   | -127.852                | 230.278        |
|                | X81            | -83.386                  | 0.666   | -262.452                | 95.678         |
| X81            | DOXATO         | 74.013                   | 0.755   | -105.052                | 253.078        |
|                | K53            | -230.066*                | 0.007   | -409.132                | -51.001        |
|                | N34            | 134.600                  | 0.216   | -44.465                 | 313.665        |
|                | X2A            | 83.386                   | 0.666   | -95.678                 | 262.452        |

\*. The mean difference is significant at the 0.05 level.

(B)

| Variety | N  | Subset   |          |
|---------|----|----------|----------|
|         |    | 1        | 2        |
| N34     | 15 | 1287.700 |          |
| X2A     | 15 | 1338.913 |          |
| DOXATO  | 15 | 1348.286 |          |
| X81     | 15 | 1422.300 |          |
| K53     | 15 |          | 1652.366 |
| p-value |    | 0.216    | 1.000    |

**Supplementary Table S7:** The mean nicotine (%) for the Oriental type varieties, along with the 95% confidence interval, for all categories' combinations of the factors area and variety.

| Area            | Variety | Mean  | 95% Confidence Interval |             |
|-----------------|---------|-------|-------------------------|-------------|
|                 |         |       | Lower Bound             | Upper Bound |
| AITOLOAKARNANIA | DOXATO  | 1.773 | 1.011                   | 2.535       |
|                 | K53     | 1.230 | 0.468                   | 1.992       |
|                 | N34     | 1.483 | 0.721                   | 2.245       |
|                 | X2A     | 2.190 | 1.428                   | 2.952       |
|                 | X81     | 1.947 | 1.185                   | 2.709       |
| KARDITSA        | DOXATO  | 1.943 | 1.181                   | 2.705       |
|                 | K53     | 1.557 | 0.795                   | 2.319       |
|                 | N34     | 1.817 | 1.055                   | 2.579       |
|                 | X2A     | 2.403 | 1.641                   | 3.165       |
|                 | X81     | 2.073 | 1.311                   | 2.835       |
| KATERINI        | DOXATO  | 1.940 | 1.178                   | 2.702       |
|                 | K53     | 1.807 | 1.045                   | 2.569       |
|                 | N34     | 1.920 | 1.158                   | 2.682       |
|                 | X2A     | 2.727 | 1.965                   | 3.489       |
|                 | X81     | 2.210 | 1.448                   | 2.972       |
| XANTHI          | DOXATO  | 2.833 | 2.071                   | 3.595       |
|                 | K53     | 2.143 | 1.381                   | 2.905       |
|                 | N34     | 1.680 | 0.918                   | 2.442       |
|                 | X2A     | 2.543 | 1.781                   | 3.305       |
|                 | X81     | 2.370 | 1.608                   | 3.132       |

**Supplementary Table S8:** The mean nicotine (%) for the Oriental type varieties, along with the 95% confidence interval, for all categories' combinations of the factors area and cultivation year.

| Area            | Cultivation Year | Mean  | 95% Confidence Interval |             |
|-----------------|------------------|-------|-------------------------|-------------|
|                 |                  |       | Lower Bound             | Upper Bound |
| AITOLOAKARNANIA | 2014             | 1.820 | 1.230                   | 2.410       |
|                 | 2015             | 1.896 | 1.306                   | 2.486       |
|                 | 2016             | 1.458 | 0.868                   | 2.048       |
| KARDITSA        | 2014             | 2.334 | 1.744                   | 2.924       |
|                 | 2015             | 1.530 | 0.940                   | 2.120       |
|                 | 2016             | 2.012 | 1.422                   | 2.602       |
| KATERINI        | 2014             | 2.138 | 1.548                   | 2.728       |
|                 | 2015             | 1.252 | 0.662                   | 1.842       |
|                 | 2016             | 2.972 | 2.382                   | 3.562       |
| XANTHI          | 2014             | 2.060 | 1.470                   | 2.650       |
|                 | 2015             | 2.014 | 1.424                   | 2.604       |
|                 | 2016             | 2.868 | 2.278                   | 3.458       |

**Supplementary Table S9:** The mean nicotine (%) for the Oriental type varieties, along with the 95% confidence interval, for all categories' combinations of the factors variety and cultivation year.

| Variety | Cultivation Year | Mean  | 95% Confidence Interval |             |
|---------|------------------|-------|-------------------------|-------------|
|         |                  |       | Lower Bound             | Upper Bound |
| DOXATO  | 2014             | 2.435 | 1.775                   | 3.095       |
|         | 2015             | 1.740 | 1.080                   | 2.400       |
|         | 2016             | 2.193 | 1.533                   | 2.852       |
| K53     | 2014             | 2.040 | 1.380                   | 2.700       |
|         | 2015             | 1.373 | 0.713                   | 2.032       |
|         | 2016             | 1.640 | 0.980                   | 2.300       |
| N34     | 2014             | 1.693 | 1.033                   | 2.352       |
|         | 2015             | 1.333 | 0.673                   | 1.992       |
|         | 2016             | 2.150 | 1.490                   | 2.810       |
| X2A     | 2014             | 2.190 | 1.530                   | 2.850       |
|         | 2015             | 2.155 | 1.495                   | 2.815       |
|         | 2016             | 3.052 | 2.393                   | 3.712       |
| X81     | 2014             | 2.083 | 1.423                   | 2.742       |
|         | 2015             | 1.765 | 1.105                   | 2.425       |
|         | 2016             | 2.602 | 1.943                   | 3.262       |

**Supplementary Table S10:** (A) Post hoc analysis (Tukey HSD) for the factor cultivation year (dependent Variable: Nicotine) for the Oriental type varieties. (B) The groups of cultivation year within the homogeneous subsets obtained by Tukey HSD for the Oriental type varieties.

(A)

| (I)<br>Cultivation Year | (J)<br>Cultivation Year | Mean Difference (I-J) | p-value | 95% Confidence Interval |             |
|-------------------------|-------------------------|-----------------------|---------|-------------------------|-------------|
|                         |                         |                       |         | Lower Bound             | Upper Bound |
| 2014                    | 2015                    | 0.415                 | 0.121   | -0.090                  | 0.920       |
|                         | 2016                    | -0.239                | 0.474   | -0.744                  | 0.265       |
| 2015                    | 2014                    | -0.415                | 0.121   | -0.920                  | 0.090       |
|                         | 2016                    | -0.654*               | 0.009   | -1.159                  | -0.149      |
| 2016                    | 2014                    | 0.239                 | 0.474   | -0.265                  | 0.744       |
|                         | 2015                    | 0.654*                | 0.009   | 0.149                   | 1.159       |

\*. The mean difference is significant at the 0.05 level.

(B)

| Cultivation Year | N  | Subset |       |
|------------------|----|--------|-------|
|                  |    | 1      | 2     |
| 2015             | 20 | 1.673  |       |
| 2014             | 20 | 2.088  | 2.088 |
| 2016             | 20 |        | 2.327 |
| p-value          |    | 0.121  | 0.474 |

**Supplementary Table S11:** (A) Post hoc analysis (Tukey HSD) for the factor area (dependent Variable: Nicotine) for the Oriental type varieties. (B) The groups of area within the homogeneous subsets obtained by Tukey HSD for the Oriental type varieties.

(A)

| (I)<br>Area     | (J)<br>Area     | Mean<br>Difference (I-J) | p-value | 95% Confidence Interval |             |
|-----------------|-----------------|--------------------------|---------|-------------------------|-------------|
|                 |                 |                          |         | Lower Bound             | Upper Bound |
| AITOLOAKARNANIA | KARDITSA        | -0.234                   | 0.750   | -0.878                  | 0.410       |
|                 | KATERINI        | -0.396                   | 0.348   | -1.040                  | 0.248       |
|                 | XANTHI          | -0.589                   | 0.081   | -1.233                  | 0.054       |
| KARDITSA        | AITOLOAKARNANIA | 0.234                    | 0.750   | -0.410                  | 0.878       |
|                 | KATERINI        | -0.162                   | 0.898   | -0.806                  | 0.482       |
|                 | XANTHI          | -0.355                   | 0.441   | -0.999                  | 0.288       |
| KATERINI        | AITOLOAKARNANIA | 0.396                    | 0.348   | -0.248                  | 1.040       |
|                 | KARDITSA        | 0.162                    | 0.898   | -0.482                  | 0.806       |
|                 | XANTHI          | -0.193                   | 0.841   | -0.837                  | 0.450       |
| XANTHI          | AITOLOAKARNANIA | 0.589                    | 0.081   | -0.054                  | 1.233       |
|                 | KARDITSA        | 0.355                    | 0.441   | -0.288                  | 0.999       |
|                 | KATERINI        | 0.193                    | 0.841   | -0.450                  | 0.837       |

(B)

| Area            | N  | Subset<br>1 |
|-----------------|----|-------------|
| AITOLOAKARNANIA | 15 | 1.724       |
| KARDITSA        | 15 | 1.958       |
| KATERINI        | 15 | 2.120       |
| XANTHI          | 15 | 2.314       |
| p-value         |    | 0.081       |

**Supplementary Table S12:** (A) Post hoc analysis (Tukey HSD) for the factor variety (dependent Variable: Nicotine) for the Oriental type varieties. (B) The groups of variety within the homogeneous subsets obtained by Tukey HSD for the Oriental type varieties.

(A)

| (I) Variety | (J) Variety | Mean Difference<br>(I-J) | p-value | 95% Confidence Interval |             |
|-------------|-------------|--------------------------|---------|-------------------------|-------------|
|             |             |                          |         | Lower Bound             | Upper Bound |
| DOXATO      | K53         | 0.438                    | 0.465   | -0.330                  | 1.207       |
|             | N34         | 0.397                    | 0.558   | -0.371                  | 1.166       |
|             | X2A         | -0.343                   | 0.685   | -1.112                  | 0.425       |
|             | X81         | -0.027                   | 1.000   | -0.796                  | 0.741       |
| K53         | DOXATO      | -0.438                   | 0.465   | -1.207                  | 0.330       |
|             | N34         | -0.040                   | 1.000   | -0.809                  | 0.728       |
|             | X2A         | -0.781*                  | 0.045   | -1.550                  | -0.012      |
|             | X81         | -0.465                   | 0.405   | -1.234                  | 0.303       |
| N34         | DOXATO      | -0.397                   | 0.558   | -1.166                  | 0.371       |
|             | K53         | 0.040                    | 1.000   | -0.728                  | 0.809       |
|             | X2A         | -0.740                   | 0.063   | -1.509                  | 0.028       |
|             | X81         | -0.425                   | 0.495   | -1.194                  | 0.344       |
| X2A         | DOXATO      | 0.343                    | 0.685   | -0.425                  | 1.112       |
|             | K53         | 0.781*                   | 0.045   | 0.012                   | 1.550       |
|             | N34         | 0.740                    | 0.063   | -0.028                  | 1.509       |
|             | X81         | 0.315                    | 0.746   | -0.453                  | 1.084       |
| X81         | DOXATO      | 0.027                    | 1.000   | -0.741                  | 0.796       |
|             | K53         | 0.465                    | 0.405   | -0.303                  | 1.234       |
|             | N34         | 0.425                    | 0.495   | -0.344                  | 1.194       |
|             | X2A         | -0.315                   | 0.746   | -1.084                  | 0.453       |

\*. The mean difference is significant at the 0.05 level.

(B)

| Variety | N  | Subset |       |
|---------|----|--------|-------|
|         |    | 1      | 2     |
| K53     | 12 | 1.684  |       |
| N34     | 12 | 1.725  | 1.725 |
| DOXATO  | 12 | 2.122  | 2.122 |
| X81     | 12 | 2.150  | 2.150 |
| X2A     | 12 |        | 2.465 |
| p-value |    | 0.405  | 0.063 |

**Supplementary Table S13:** The mean sugars content (%) for the Oriental type varieties, along with the 95% confidence interval, for all categories' combinations of the factors area and variety.

| Area            | Variety | Mean  | 95% Confidence Interval |             |
|-----------------|---------|-------|-------------------------|-------------|
|                 |         |       | Lower Bound             | Upper Bound |
| AITOLOAKARNANIA | DOXATO  | 5.173 | 3.439                   | 6.908       |
|                 | K53     | 6.220 | 4.486                   | 7.954       |
|                 | N34     | 9.143 | 7.409                   | 10.878      |
|                 | X2A     | 5.050 | 3.316                   | 6.784       |
|                 | X81     | 6.663 | 4.929                   | 8.398       |
| KARDITSA        | DOXATO  | 4.623 | 2.889                   | 6.358       |
|                 | K53     | 4.960 | 3.226                   | 6.694       |
|                 | N34     | 4.587 | 2.852                   | 6.321       |
|                 | X2A     | 2.613 | 0.879                   | 4.348       |
|                 | X81     | 3.853 | 2.119                   | 5.588       |
| KATERINI        | DOXATO  | 4.287 | 2.552                   | 6.021       |
|                 | K53     | 4.433 | 2.699                   | 6.168       |
|                 | N34     | 7.473 | 5.739                   | 9.208       |
|                 | X2A     | 4.053 | 2.319                   | 5.788       |
|                 | X81     | 5.820 | 4.086                   | 7.554       |
| XANTHI          | DOXATO  | 3.843 | 2.109                   | 5.578       |
|                 | K53     | 2.087 | 0.352                   | 3.821       |
|                 | N34     | 3.503 | 1.769                   | 5.238       |
|                 | X2A     | 2.833 | 1.099                   | 4.568       |
|                 | X81     | 3.067 | 1.332                   | 4.801       |

**Supplementary Table S14:** The mean sugars content (%) for the Oriental type varieties, along with the 95% confidence interval, for all categories' combinations of the factors area and cultivation year.

| Area            | Cultivation Year | Mean  | 95% Confidence Interval |             |
|-----------------|------------------|-------|-------------------------|-------------|
|                 |                  |       | Lower Bound             | Upper Bound |
| AITOLOAKARNANIA | 2014             | 4.732 | 3.389                   | 6.075       |
|                 | 2015             | 7.730 | 6.387                   | 9.073       |
|                 | 2016             | 6.888 | 5.545                   | 8.231       |
| KARDITSA        | 2014             | 1.210 | -0.133                  | 2.553       |
|                 | 2015             | 4.630 | 3.287                   | 5.973       |
|                 | 2016             | 6.542 | 5.199                   | 7.885       |
| KATERINI        | 2014             | 3.666 | 2.323                   | 5.009       |
|                 | 2015             | 9.292 | 7.949                   | 10.635      |
|                 | 2016             | 2.682 | 1.339                   | 4.025       |
| XANTHI          | 2014             | 4.034 | 2.691                   | 5.377       |
|                 | 2015             | 4.656 | 3.313                   | 5.999       |
|                 | 2016             | 0.510 | -0.833                  | 1.853       |

**Supplementary Table S15:** The mean sugars content (%) for the Oriental type varieties, along with the 95% confidence interval, for all categories' combinations of the factors variety and cultivation years.

| Variety | Cultivation Year | Mean  | 95% Confidence Interval |             |
|---------|------------------|-------|-------------------------|-------------|
|         |                  |       | Lower Bound             | Upper Bound |
| DOXATO  | 2014             | 3.325 | 1.823                   | 4.827       |
|         | 2015             | 4.970 | 3.468                   | 6.472       |
|         | 2016             | 5.150 | 3.648                   | 6.652       |
| K53     | 2014             | 2.827 | 1.326                   | 4.329       |
|         | 2015             | 6.680 | 5.178                   | 8.182       |
|         | 2016             | 3.767 | 2.266                   | 5.269       |
| N34     | 2014             | 4.940 | 3.438                   | 6.442       |
|         | 2015             | 9.778 | 8.276                   | 11.279      |
|         | 2016             | 3.812 | 2.311                   | 5.314       |
| X2A     | 2014             | 2.712 | 1.211                   | 4.214       |
|         | 2015             | 4.605 | 3.103                   | 6.107       |
|         | 2016             | 3.595 | 2.093                   | 5.097       |
| X81     | 2014             | 3.248 | 1.746                   | 4.749       |
|         | 2015             | 6.853 | 5.351                   | 8.354       |
|         | 2016             | 4.452 | 2.951                   | 5.954       |

**Supplementary Table S16:** (A) Post hoc analysis (Tukey HSD) for the factor cultivation year (dependent Variable: Sugars) for the Oriental type varieties. (B) The groups of cultivation year are displayed within the homogeneous subsets obtained by Tukey HSD for the Oriental type varieties.

(A)

| (I)<br>Cultivation Year | (J)<br>Cultivation Year | Mean Difference (I-J) | p-value | 95% Confidence Interval |             |
|-------------------------|-------------------------|-----------------------|---------|-------------------------|-------------|
|                         |                         |                       |         | Lower Bound             | Upper Bound |
| 2014                    | 2015                    | -3.1665*              | 0.000   | -4.3159                 | -2.0171     |
|                         | 2016                    | -0.7450               | 0.257   | -1.8944                 | 0.4044      |
| 2015                    | 2014                    | 3.1665*               | 0.000   | 2.0171                  | 4.3159      |
|                         | 2016                    | 2.4215*               | 0.000   | 1.2721                  | 3.5709      |
| 2016                    | 2014                    | 0.7450                | 0.257   | -0.4044                 | 1.8944      |
|                         | 2015                    | -2.4215*              | 0.000   | -3.5709                 | -1.2721     |

\*. The mean difference is significant at the 0.05 level.

(B)

| Cultivation Year | N  | Subset |       |
|------------------|----|--------|-------|
|                  |    | 1      | 2     |
| 2014             | 20 | 3.410  |       |
| 2016             | 20 | 4.155  |       |
| 2015             | 20 |        | 6.577 |
| p-value          |    | 0.257  | 1.000 |

**Supplementary Table S17:** (A) Post hoc analysis (Tukey HSD) for the factor area (dependent Variable: Sugars) for the Oriental type varieties. (B) The groups of area within the homogeneous subsets obtained by Tukey HSD for the Oriental type varieties.

(A)

| (I)<br>Area     | (J)<br>Area     | Mean Difference (I-J) | p-value | 95% Confidence Interval |             |
|-----------------|-----------------|-----------------------|---------|-------------------------|-------------|
|                 |                 |                       |         | Lower Bound             | Upper Bound |
| AITOLOAKARNANIA | KARDITSA        | 2.322*                | 0.001   | 0.856                   | 3.788       |
|                 | KATERINI        | 1.236                 | 0.120   | -0.229                  | 2.702       |
|                 | XANTHI          | 3.383*                | 0.000   | 1.917                   | 4.849       |
| KARDITSA        | AITOLOAKARNANIA | -2.322*               | 0.001   | -3.788                  | -0.856      |
|                 | KATERINI        | -1.086                | 0.201   | -2.552                  | 0.380       |
|                 | XANTHI          | 1.060                 | 0.217   | -0.405                  | 2.526       |
| KATERINI        | AITOLOAKARNANIA | -1.236                | 0.120   | -2.702                  | 0.229       |
|                 | KARDITSA        | 1.086                 | 0.201   | -0.380                  | 2.552       |
|                 | XANTHI          | 2.146*                | 0.003   | 0.680                   | 3.612       |
| XANTHI          | AITOLOAKARNANIA | -3.383*               | 0.000   | -4.849                  | -1.917      |
|                 | KARDITSA        | -1.060                | 0.217   | -2.526                  | 0.405       |
|                 | KATERINI        | -2.146*               | 0.003   | -3.612                  | -0.680      |

\*. The mean difference is significant at the 0.05 level.

(B)

| Area            | N  | Subset |       |       |
|-----------------|----|--------|-------|-------|
|                 |    | 1      | 2     | 3     |
| XANTHI          | 15 | 3.066  |       |       |
| KARDITSA        | 15 | 4.127  | 4.127 |       |
| KATERINI        | 15 |        | 5.213 | 5.213 |
| AITOLOAKARNANIA | 15 |        |       | 6.450 |
| p-value         |    | 0.217  | 0.201 | 0.120 |

**Supplementary Table S18:** (A) Post hoc analysis (Tukey HSD) for the factor variety (dependent Variable: Sugars) for the Oriental type varieties. (B) The groups of variety within the homogeneous subsets obtained by Tukey HSD for the Oriental type varieties.

(A)

| (I)<br>Variety | (J)<br>Variety | Mean<br>Difference (I-J) | p-value | 95% Confidence Interval |             |
|----------------|----------------|--------------------------|---------|-------------------------|-------------|
|                |                |                          |         | Lower<br>Bound          | Upper Bound |
| DOXATO         | K53            | 0.056                    | 1.000   | -1.693                  | 1.807       |
|                | N34            | -1.695                   | 0.061   | -3.445                  | 0.055       |
|                | X2A            | 0.844                    | 0.621   | -0.906                  | 2.594       |
|                | X81            | -0.369                   | 0.970   | -2.119                  | 1.381       |
| K53            | DOXATO         | -0.056                   | 1.000   | -1.807                  | 1.693       |
|                | N34            | -1.751*                  | 0.050   | -3.502                  | -0.001      |
|                | X2A            | 0.787                    | 0.679   | -0.963                  | 2.538       |
|                | X81            | -0.425                   | 0.951   | -2.176                  | 1.324       |
| N34            | DOXATO         | 1.695                    | 0.061   | -0.055                  | 3.445       |
|                | K53            | 1.751*                   | 0.050   | 0.001                   | 3.502       |
|                | X2A            | 2.539*                   | 0.002   | 0.788                   | 4.289       |
|                | X81            | 1.325                    | 0.202   | -0.424                  | 3.076       |
| X2A            | DOXATO         | -0.844                   | 0.621   | -2.594                  | 0.906       |
|                | K53            | -0.787                   | 0.679   | -2.538                  | 0.963       |
|                | N34            | -2.539*                  | 0.002   | -4.289                  | -0.788      |
|                | X81            | -1.213                   | 0.277   | -2.963                  | 0.537       |
| X81            | DOXATO         | 0.369                    | 0.970   | -1.381                  | 2.119       |
|                | K53            | 0.425                    | 0.951   | -1.324                  | 2.176       |
|                | N34            | -1.325                   | 0.202   | -3.076                  | 0.424       |
|                | X2A            | 1.213                    | 0.277   | -0.537                  | 2.963       |

\*, The mean difference is significant at the 0.05 level.

(B)

| Variety | N  | Subset |       |
|---------|----|--------|-------|
|         |    | 1      | 2     |
| X2A     | 12 | 3.637  |       |
| K53     | 12 | 4.425  |       |
| DOXATO  | 12 | 4.481  | 4.481 |
| X81     | 12 | 4.850  | 4.850 |
| N34     | 12 |        | 6.176 |
| Sig.    |    | 0.277  | 0.061 |

## B. Flue and air cured type varieties

**Supplementary Table S19:** The mean yield (kg/ha) for the flue and air cured type varieties, along with the 95% confidence interval, for all categories' combinations of the factors area and variety.

| Area            | Variety    | Mean     | 95% Confidence Interval |             |
|-----------------|------------|----------|-------------------------|-------------|
|                 |            |          | Lower Bound             | Upper Bound |
| AITOLOAKARNANIA | Burley 21E | 2673.633 | 2204.925                | 3142.342    |
|                 | KLIO       | 4044.667 | 3575.958                | 4513.375    |
|                 | NC297      | 4058.000 | 3589.291                | 4526.709    |
|                 | NC7LC      | 3799.000 | 3330.291                | 4267.709    |
|                 | NIKI       | 3555.000 | 3086.291                | 4023.709    |
|                 | VE9        | 3902.000 | 3433.291                | 4370.709    |
| KARDITSA        | Burley 21E | 1540.667 | 1071.958                | 2009.375    |
|                 | KLIO       | 1780.333 | 1311.625                | 2249.042    |
|                 | NC297      | 2390.667 | 1921.958                | 2859.375    |
|                 | NC7LC      | 2024.333 | 1555.625                | 2493.042    |
|                 | NIKI       | 2127.667 | 1658.958                | 2596.375    |
|                 | VE9        | 1943.000 | 1474.291                | 2411.709    |
| XANTHI          | Burley 21E | 3538.333 | 3069.625                | 4007.042    |
|                 | KLIO       | 3414.667 | 2945.958                | 3883.375    |
|                 | NC297      | 3528.333 | 3059.625                | 3997.042    |
|                 | NC7LC      | 3584.333 | 3115.625                | 4053.042    |
|                 | NIKI       | 3626.667 | 3157.958                | 4095.375    |
|                 | VE9        | 3353.000 | 2884.291                | 3821.709    |

**Supplementary Table S20:** The mean yield (kg/ha) for the flue and air cured type varieties, along with the 95% confidence interval, for all categories' combinations of the factors area and cultivation year.

| Area            | Cultivation year | Mean     | 95% Confidence Interval |             |
|-----------------|------------------|----------|-------------------------|-------------|
|                 |                  |          | Lower Bound             | Upper Bound |
| AITOLOAKARNANIA | 2014             | 4281.167 | 3949.740                | 4612.594    |
|                 | 2015             | 3571.667 | 3240.240                | 3903.094    |
|                 | 2016             | 3163.317 | 2831.890                | 3494.744    |
| KARDITSA        | 2014             | 2178.500 | 1847.073                | 2509.927    |
|                 | 2015             | 1581.667 | 1250.240                | 1913.094    |
|                 | 2016             | 2143.167 | 1811.740                | 2474.594    |
| XANTHI          | 2014             | 3572.000 | 3240.573                | 3903.427    |
|                 | 2015             | 3513.000 | 3181.573                | 3844.427    |
|                 | 2016             | 3437.667 | 3106.240                | 3769.094    |

**Supplementary Table S21:** The mean yield (kg/ha) for the flue and air cured type varieties, along with the 95% confidence interval, for all categories' combinations of the factors variety and cultivation year.

| Variety    | Cultivation year | Mean     | 95% Confidence Interval |             |
|------------|------------------|----------|-------------------------|-------------|
|            |                  |          | Lower Bound             | Upper Bound |
| Burley 21E | 2014             | 2589.000 | 2120.291                | 3057.709    |
|            | 2015             | 2707.667 | 2238.958                | 3176.375    |
|            | 2016             | 2455.967 | 1987.258                | 2924.675    |
| KLIO       | 2014             | 3363.000 | 2894.291                | 3831.709    |
|            | 2015             | 2987.667 | 2518.958                | 3456.375    |
|            | 2016             | 2889.000 | 2420.291                | 3357.709    |
| NC297      | 2014             | 3768.333 | 3299.625                | 4237.042    |
|            | 2015             | 3036.667 | 2567.958                | 3505.375    |
|            | 2016             | 3172.000 | 2703.291                | 3640.709    |
| NC7LC      | 2014             | 3646.333 | 3177.625                | 4115.042    |
|            | 2015             | 2936.667 | 2467.958                | 3405.375    |
|            | 2016             | 2824.667 | 2355.958                | 3293.375    |
| NIKI       | 2014             | 3386.000 | 2917.291                | 3854.709    |
|            | 2015             | 2751.000 | 2282.291                | 3219.709    |
|            | 2016             | 3172.333 | 2703.625                | 3641.042    |
| VE9        | 2014             | 3310.667 | 2841.958                | 3779.375    |
|            | 2015             | 2913.000 | 2444.291                | 3381.709    |
|            | 2016             | 2974.333 | 2505.625                | 3443.042    |

**Supplementary Table S22:** (A) Post hoc analysis (Tukey HSD) for the factor cultivation year (dependent Variable: Yield) for the flue and air cured type varieties. (B) The groups of cultivation year within the homogeneous subsets obtained by Tukey HSD for the flue and air cured type varieties.

(A)

| (I)<br>Cultivation<br>year | (J)<br>Cultivation<br>year | Mean<br>Difference (I-<br>J) | p-value | 95% Confidence Interval |                |
|----------------------------|----------------------------|------------------------------|---------|-------------------------|----------------|
|                            |                            |                              |         | Lower<br>Bound          | Upper<br>Bound |
| 2014                       | 2015                       | 455.111*                     | 0.006   | 126.900                 | 783.322        |
|                            | 2016                       | 429.172*                     | 0.009   | 100.961                 | 757.383        |
| 2015                       | 2014                       | -455.111*                    | 0.006   | -783.322                | -126.900       |
|                            | 2016                       | -25.938                      | 0.978   | -354.149                | 302.272        |
| 2016                       | 2014                       | -429.172*                    | 0.009   | -757.383                | -100.961       |
|                            | 2015                       | 25.938                       | 0.978   | -302.272                | 354.149        |

\*. The mean difference is significant at the 0.05 level.

(B)

| Cultivation<br>year | N  | Subset   |          |
|---------------------|----|----------|----------|
|                     |    | 1        | 2        |
| 2015                | 18 | 2888.778 |          |
| 2016                | 18 | 2914.716 |          |
| 2014                | 18 |          | 3343.889 |
| p-value             |    | 0.978    | 1.000    |

**Supplementary Table S23:** (A) Post hoc analysis (Tukey HSD) for the factor area (dependent Variable: Yield) for the flue and air cured type varieties. (B) The groups of area within the homogeneous subsets obtained by Tukey HSD for the flue and air cured type varieties.

(A)

| (I)<br>Area     | (J)<br>Area     | Mean<br>Difference<br>(I-J) | p-value | 95% Confidence Interval |                |
|-----------------|-----------------|-----------------------------|---------|-------------------------|----------------|
|                 |                 |                             |         | Lower<br>Bound          | Upper<br>Bound |
| AITOLOAKARNANIA | KARDITSA        | 1704.272*                   | 0.000   | 1376.061                | 2032.483       |
|                 | XANTHI          | 164.494                     | 0.429   | -163.716                | 492.705        |
| KARDITSA        | AITOLOAKARNANIA | -                           | 0.000   | -2032.483               | -1376.061      |
|                 | XANTHI          | -                           | 0.000   | -1867.988               | -1211.567      |
| XANTHI          | AITOLOAKARNANIA | -164.494                    | 0.429   | -492.705                | 163.716        |
|                 | KARDITSA        | 1539.777*                   | 0.000   | 1211.567                | 1867.989       |

\*. The mean difference is significant at the 0.05 level.

(B)

| Area            | N  | Subset   |          |
|-----------------|----|----------|----------|
|                 |    | 1        | 2        |
| KARDITSA        | 18 | 1967.778 |          |
| XANTHI          | 18 |          | 3507.556 |
| AITOLOAKARNANIA | 18 |          | 3672.050 |
| p-value         |    | 1.000    | 0.429    |

**Supplementary Table S24:** (A) Post hoc analysis (Tukey HSD) for the factor variety (dependent Variable: Yield) for the flue and air cured type varieties. (B) The groups of variety within the homogeneous subsets obtained by Tukey HSD for the flue and air cured type varieties.

(A)

| (I)<br>Variety | (J)<br>Variety | Mean<br>Difference<br>(I-J) | p-value | 95% Confidence Interval |                |
|----------------|----------------|-----------------------------|---------|-------------------------|----------------|
|                |                |                             |         | Lower<br>Bound          | Upper<br>Bound |
| Burley 21E     | KLIO           | -495.678                    | 0.119   | -1072.351               | 80.996         |
|                | NC297          | -741.456*                   | 0.007   | -1318.129               | -164.781       |
|                | NC7LC          | -551.678                    | 0.066   | -1128.351               | 24.996         |
|                | NIKI           | -518.900                    | 0.093   | -1095.574               | 57.774         |
|                | VE9            | -481.789                    | 0.137   | -1058.463               | 94.885         |
| KLIO           | Burley 21E     | 495.678                     | 0.119   | -80.996                 | 1072.351       |

|       |            |          |       |          |          |
|-------|------------|----------|-------|----------|----------|
|       | NC297      | -245.778 | 0.760 | -822.451 | 330.896  |
|       | NC7LC      | -56.000  | 1.000 | -632.674 | 520.674  |
|       | NIKI       | -23.222  | 1.000 | -599.896 | 553.451  |
|       | VE9        | 13.889   | 1.000 | -562.785 | 590.563  |
| NC297 | Burley 21E | 741.456* | 0.007 | 164.781  | 1318.129 |
|       | KLIO       | 245.778  | 0.760 | -330.896 | 822.451  |
|       | NC7LC      | 189.778  | 0.901 | -386.896 | 766.451  |
|       | NIKI       | 222.556  | 0.826 | -354.118 | 799.229  |
|       | VE9        | 259.667  | 0.718 | -317.007 | 836.340  |
| NC7LC | Burley 21E | 551.678  | 0.066 | -24.996  | 1128.351 |
|       | KLIO       | 56.000   | 1.000 | -520.674 | 632.674  |
|       | NC297      | -189.778 | 0.901 | -766.451 | 386.896  |
|       | NIKI       | 32.778   | 1.000 | -543.896 | 609.451  |
|       | VE9        | 69.889   | 0.999 | -506.785 | 646.563  |
| NIKI  | Burley 21E | 518.900  | 0.093 | -57.774  | 1095.574 |
|       | KLIO       | 23.222   | 1.000 | -553.451 | 599.896  |
|       | NC297      | -222.556 | 0.826 | -799.229 | 354.118  |
|       | NC7LC      | -32.778  | 1.000 | -609.451 | 543.896  |
|       | VE9        | 37.111   | 1.000 | -539.563 | 613.785  |
| VE9   | Burley 21E | 481.789  | 0.137 | -94.885  | 1058.463 |
|       | KLIO       | -13.889  | 1.000 | -590.563 | 562.785  |
|       | NC297      | -259.667 | 0.718 | -836.340 | 317.007  |
|       | NC7LC      | -69.889  | 0.999 | -646.563 | 506.785  |
|       | NIKI       | -37.111  | 1.000 | -613.785 | 539.563  |

\*. The mean difference is significant at the 0.05 level.

(B)

| Variety    | N | Subset   |          |
|------------|---|----------|----------|
|            |   | 1        | 2        |
| Burley 21E | 9 | 2584.211 |          |
| VE9        | 9 | 3066.000 | 3066.000 |
| KLIO       | 9 | 3079.889 | 3079.889 |
| NIKI       | 9 | 3103.111 | 3103.111 |
| NC7LC      | 9 | 3135.889 | 3135.889 |
| NC297      | 9 |          | 3325.667 |
| p-value    |   | 0.066    | 0.718    |

**Supplementary Table S25:** The mean nicotine (%) for the flue and air cured type varieties, along with the 95% confidence interval, for all categories' combinations of the factors area and variety.

| Area            | Variety    | Mean  | 95% Confidence Interval |             |
|-----------------|------------|-------|-------------------------|-------------|
|                 |            |       | Lower Bound             | Upper Bound |
| AITOLOAKARNANIA | Burley 21E | 1.217 | 0.882                   | 1.551       |
|                 | KLIO       | 1.393 | 1.059                   | 1.728       |
|                 | NC297      | 1.140 | 0.806                   | 1.474       |
|                 | NC7LC      | 1.243 | 0.909                   | 1.578       |
|                 | NIKI       | 1.123 | 0.789                   | 1.458       |
|                 | VE9        | 1.280 | 0.946                   | 1.614       |
| KARDITSA        | Burley 21E | 1.490 | 1.156                   | 1.824       |
|                 | KLIO       | 1.397 | 1.062                   | 1.731       |
|                 | NC297      | 1.227 | 0.892                   | 1.561       |
|                 | NC7LC      | 1.393 | 1.059                   | 1.728       |
|                 | NIKI       | 1.763 | 1.429                   | 2.098       |
|                 | VE9        | 1.330 | 0.996                   | 1.664       |

**Supplementary Table S26:** The mean nicotine (%) for the flue and air cured type varieties, along with the 95% confidence interval, for all categories' combinations of the factors area and cultivation year.

| Area            | Cultivation Year | Mean  | 95% Confidence Interval |             |
|-----------------|------------------|-------|-------------------------|-------------|
|                 |                  |       | Lower Bound             | Upper Bound |
| AITOLOAKARNANIA | 2014             | 1.210 | 0.974                   | 1.446       |
|                 | 2015             | 1.405 | 1.169                   | 1.641       |
|                 | 2016             | 1.083 | 0.847                   | 1.320       |
| KARDITSA        | 2014             | 1.077 | 0.840                   | 1.313       |
|                 | 2015             | 1.332 | 1.095                   | 1.568       |

|  |      |       |       |       |
|--|------|-------|-------|-------|
|  | 2016 | 1.892 | 1.655 | 2.128 |
|--|------|-------|-------|-------|

**Supplementary Table S27:** The mean nicotine (%) for the flue and air cured type varieties, along with the 95% confidence interval, for all categories' combinations of the factors variety and cultivation year.

| Variety    | Cultivation Year | Mean  | 95% Confidence Interval |             |
|------------|------------------|-------|-------------------------|-------------|
|            |                  |       | Lower Bound             | Upper Bound |
| Burley 21E | 2014             | 1.070 | 0.661                   | 1.479       |
|            | 2015             | 1.495 | 1.086                   | 1.904       |
|            | 2016             | 1.495 | 1.086                   | 1.904       |
| KLIO       | 2014             | 1.190 | 0.781                   | 1.599       |
|            | 2015             | 1.360 | 0.951                   | 1.769       |
|            | 2016             | 1.635 | 1.226                   | 2.044       |
| NC297      | 2014             | 1.165 | 0.756                   | 1.574       |
|            | 2015             | 1.060 | 0.651                   | 1.469       |
|            | 2016             | 1.325 | 0.916                   | 1.734       |
| NC7LC      | 2014             | 1.175 | 0.766                   | 1.584       |
|            | 2015             | 1.465 | 1.056                   | 1.874       |
|            | 2016             | 1.315 | 0.906                   | 1.724       |
| NIKI       | 2014             | 1.130 | 0.721                   | 1.539       |
|            | 2015             | 1.710 | 1.301                   | 2.119       |
|            | 2016             | 1.490 | 1.081                   | 1.899       |
| VE9        | 2014             | 1.130 | 0.721                   | 1.539       |
|            | 2015             | 1.120 | 0.711                   | 1.529       |
|            | 2016             | 1.665 | 1.256                   | 2.074       |

**Supplementary Table S28:** (A) Post hoc analysis (Tukey HSD) for the factor cultivation year (dependent Variable: Nicotine) for the flue and air cured type varieties. (B) The groups of cultivation year within the homogeneous subsets obtained by Tukey HSD for the flue and air cured type varieties.

(A)

| (I)<br>Cultivation Year | (J)<br>Cultivation Year | Mean Difference (I-J) | p-value | 95% Confidence Interval |             |
|-------------------------|-------------------------|-----------------------|---------|-------------------------|-------------|
|                         |                         |                       |         | Lower Bound             | Upper Bound |
| 2014                    | 2015                    | -0.225                | 0.135   | -0.515                  | 0.066       |
|                         | 2016                    | -0.344*               | 0.022   | -0.635                  | -0.053      |
| 2015                    | 2014                    | 0.225                 | 0.135   | -0.065                  | 0.516       |
|                         | 2016                    | -0.119                | 0.522   | -0.410                  | 0.172       |
| 2016                    | 2014                    | 0.344*                | 0.022   | 0.053                   | 0.635       |
|                         | 2015                    | 0.119                 | 0.522   | -0.172                  | 0.410       |

\*. The mean difference is significant at the 0.05 level.

(B)

| Cultivation Year | N  | Subset |       |
|------------------|----|--------|-------|
|                  |    | 1      | 2     |
| 2014             | 12 | 1.143  |       |
| 2015             | 12 | 1.368  | 1.368 |
| 2016             | 12 |        | 1.487 |
| p-value          |    | 0.135  | 0.522 |

**Supplementary Table S29:** (A) Post hoc analysis (Tukey HSD) for the factor variety (dependent Variable: Nicotine) for the flue and air cured type varieties. (B) The groups of variety within the homogeneous subsets obtained by Tukey HSD for the flue and air cured type varieties.

(A)

| (I)<br>Variety | (J)<br>Variety | Mean Difference (I-J) | p-value | 95% Confidence Interval |             |
|----------------|----------------|-----------------------|---------|-------------------------|-------------|
|                |                |                       |         | Lower Bound             | Upper Bound |
| Burley 21E     | KLIO           | -0.041                | 1.000   | -0.562                  | 0.479       |
|                | NC297          | 0.170                 | 0.857   | -0.351                  | 0.691       |
|                | NC7LC          | 0.035                 | 1.000   | -0.486                  | 0.556       |
|                | NIKI           | -0.090                | 0.989   | -0.611                  | 0.431       |
|                | VE9            | 0.048                 | 0.999   | -0.472                  | 0.569       |

|       |            |        |       |        |       |
|-------|------------|--------|-------|--------|-------|
| KLIO  | Burley 21E | 0.041  | 1.000 | -0.479 | 0.562 |
|       | NC297      | 0.211  | 0.721 | -0.309 | 0.732 |
|       | NC7LC      | 0.076  | 0.994 | -0.444 | 0.597 |
|       | NIKI       | -0.048 | 0.999 | -0.569 | 0.472 |
|       | VE9        | 0.090  | 0.989 | -0.431 | 0.611 |
| NC297 | Burley 21E | -0.170 | 0.857 | -0.691 | 0.351 |
|       | KLIO       | -0.211 | 0.721 | -0.732 | 0.309 |
|       | NC7LC      | -0.135 | 0.938 | -0.656 | 0.386 |
|       | NIKI       | -0.260 | 0.542 | -0.781 | 0.261 |
|       | VE9        | -0.121 | 0.959 | -0.642 | 0.399 |
| NC7LC | Burley 21E | -0.035 | 1.000 | -0.556 | 0.486 |
|       | KLIO       | -0.076 | 0.994 | -0.597 | 0.444 |
|       | NC297      | 0.135  | 0.938 | -0.386 | 0.656 |
|       | NIKI       | -0.125 | 0.954 | -0.646 | 0.396 |
|       | VE9        | 0.013  | 1.000 | -0.507 | 0.534 |
| NIKI  | Burley 21E | 0.090  | 0.989 | -0.431 | 0.611 |
|       | KLIO       | 0.048  | 0.999 | -0.472 | 0.569 |
|       | NC297      | 0.260  | 0.542 | -0.261 | 0.781 |
|       | NC7LC      | 0.125  | 0.954 | -0.396 | 0.646 |
|       | VE9        | 0.138  | 0.932 | -0.382 | 0.659 |
| VE9   | Burley 21E | -0.048 | 0.999 | -0.569 | 0.472 |
|       | KLIO       | -0.090 | 0.989 | -0.611 | 0.431 |
|       | NC297      | 0.121  | 0.959 | -0.399 | 0.642 |
|       | NC7LC      | -0.013 | 1.000 | -0.534 | 0.507 |
|       | NIKI       | -0.138 | 0.932 | -0.659 | 0.382 |

(B)

| Variety    | N | Subset<br>1 |
|------------|---|-------------|
| NC297      | 6 | 1.1833      |
| VE9        | 6 | 1.3050      |
| NC7LC      | 6 | 1.3183      |
| Burley 21E | 6 | 1.3533      |
| KLIO       | 6 | 1.3950      |
| NIKI       | 6 | 1.4433      |
| p-value    |   | 0.542       |

**Supplementary Table S30:** The mean of sugars (%) for the flue and air cured type varieties, along with the 95% confidence interval, for all categories' combinations of the factors area and variety.

| Area            | Variety    | Mean   | 95% Confidence Interval |             |
|-----------------|------------|--------|-------------------------|-------------|
|                 |            |        | Lower Bound             | Upper Bound |
| AITOLOAKARNANIA | Burley 21E | 1.657  | -0.303                  | 3.616       |
|                 | KLIO       | 11.130 | 9.170                   | 13.090      |
|                 | NC297      | 11.960 | 10.000                  | 13.920      |
|                 | NC7LC      | 1.350  | -0.610                  | 3.310       |
|                 | NIKI       | 12.587 | 10.627                  | 14.546      |
|                 | VE9        | 14.507 | 12.547                  | 16.466      |
| KARDITSA        | Burley 21E | 5.100  | 3.140                   | 7.060       |
|                 | KLIO       | 10.333 | 8.374                   | 12.293      |
|                 | NC297      | 11.953 | 9.994                   | 13.913      |
|                 | NC7LC      | 5.630  | 3.670                   | 7.590       |
|                 | NIKI       | 8.357  | 6.397                   | 10.316      |
|                 | VE9        | 15.063 | 13.104                  | 17.023      |

**Supplementary Table S31:** The mean of sugars (%) for the flue and air cured type varieties, along with the 95% confidence interval, for all categories' combinations of the factors area and cultivation year.

| Area            | Cultivation<br>Year | Mean  | 95% Confidence Interval |             |
|-----------------|---------------------|-------|-------------------------|-------------|
|                 |                     |       | Lower Bound             | Upper Bound |
| AITOLOAKARNANIA | 2014                | 9.212 | 7.826                   | 10.597      |
|                 | 2015                | 8.670 | 7.284                   | 10.056      |
|                 | 2016                | 8.713 | 7.328                   | 10.099      |
|                 |                     |       |                         |             |
| KARDITSA        | 2014                | 7.887 | 6.501                   | 9.272       |

|      |        |        |        |
|------|--------|--------|--------|
| 2015 | 12.222 | 10.836 | 13.607 |
| 2016 | 8.110  | 6.724  | 9.496  |

**Supplementary Table S32:** The mean of sugars (%) for the flue and air cured type varieties, along with the 95% confidence interval, for all categories' combinations of the factors variety and cultivation year.

| Variety    | Cultivation Year | Mean   | 95% Confidence Interval |             |
|------------|------------------|--------|-------------------------|-------------|
|            |                  |        | Lower Bound             | Upper Bound |
| Burley 21E | 2014             | 2.865  | 0.465                   | 5.265       |
|            | 2015             | 4.755  | 2.355                   | 7.155       |
|            | 2016             | 2.515  | 0.115                   | 4.915       |
| KLIO       | 2014             | 9.970  | 7.570                   | 12.370      |
|            | 2015             | 10.790 | 8.390                   | 13.190      |
|            | 2016             | 11.435 | 9.035                   | 13.835      |
| NC297      | 2014             | 10.150 | 7.750                   | 12.550      |
|            | 2015             | 15.175 | 12.775                  | 17.575      |
|            | 2016             | 10.545 | 8.145                   | 12.945      |
| NC7LC      | 2014             | 2.630  | 0.230                   | 5.030       |
|            | 2015             | 4.915  | 2.515                   | 7.315       |
|            | 2016             | 2.925  | 0.525                   | 5.325       |
| NIKI       | 2014             | 12.810 | 10.410                  | 15.210      |
|            | 2015             | 10.180 | 7.780                   | 12.580      |
|            | 2016             | 8.425  | 6.025                   | 10.825      |
| VE9        | 2014             | 12.870 | 10.470                  | 15.270      |
|            | 2015             | 16.860 | 14.460                  | 19.260      |
|            | 2016             | 14.625 | 12.225                  | 17.025      |

**Supplementary Table S33:** (A) Post hoc analysis (Tukey HSD) for the factor cultivation year (dependent Variable: Sugars) for the flue and air cured type varieties. (B) The groups of cultivation year within the homogeneous subsets obtained by Tukey HSD for the flue and air cured type varieties.

(A)

| (I)<br>Cultivation Year | (J)<br>Cultivation Year | Mean Difference (I-J) | p-value | 95% Confidence Interval |             |
|-------------------------|-------------------------|-----------------------|---------|-------------------------|-------------|
|                         |                         |                       |         | Lower Bound             | Upper Bound |
| 2014                    | 2015                    | -1.896*               | 0.030   | -3.601                  | -0.191      |
|                         | 2016                    | 0.137                 | 0.973   | -1.567                  | 1.842       |
| 2015                    | 2014                    | 1.896*                | 0.030   | 0.191                   | 3.601       |
|                         | 2016                    | 2.034*                | 0.021   | 0.329                   | 3.739       |
| 2016                    | 2014                    | -0.137                | 0.973   | -1.842                  | 1.567       |
|                         | 2015                    | -2.034*               | 0.021   | -3.739                  | -0.329      |

\*. The mean difference is significant at the 0.05 level.

(B)

| Cultivation Year | N  | Subset |        |
|------------------|----|--------|--------|
|                  |    | 1      | 2      |
| 2016             | 12 | 8.411  |        |
| 2014             | 12 | 8.549  |        |
| 2015             | 12 |        | 10.445 |
| p-value          |    | 0.973  | 1.000  |

**Supplementary Table S34:** (A) Post hoc analysis (Tukey HSD) for the factor variety (dependent Variable: Sugars) for the flue and air cured type varieties. (B) The groups of variety within the homogeneous subsets obtained by Tukey HSD for the flue and air cured type varieties.

(A)

| (I)<br>Variety | (J)<br>Variety | Mean Difference (I-J) | p-value | 95% Confidence Interval |             |
|----------------|----------------|-----------------------|---------|-------------------------|-------------|
|                |                |                       |         | Lower Bound             | Upper Bound |
| Burley 21E     | KLIO           | -7.353*               | 0.000   | -10.408                 | -4.298      |
|                | NC297          | -8.578*               | 0.000   | -11.633                 | -5.523      |
|                | NC7LC          | -0.111                | 1.000   | -3.166                  | 2.943       |
|                | NIKI           | -7.093*               | 0.000   | -10.148                 | -4.038      |
|                | VE9            | -11.406*              | 0.000   | -14.461                 | -8.351      |

|       |            |          |       |         |        |
|-------|------------|----------|-------|---------|--------|
| KLIO  | Burley 21E | 7.353*   | 0.000 | 4.298   | 10.408 |
|       | NC297      | -1.225   | 0.731 | -4.279  | 1.829  |
|       | NC7LC      | 7.241*   | 0.000 | 4.186   | 10.296 |
|       | NIKI       | 0.260    | 1.000 | -2.794  | 3.314  |
|       | VE9        | -4.053*  | 0.009 | -7.108  | -0.998 |
| NC297 | Burley 21E | 8.578*   | 0.000 | 5.523   | 11.633 |
|       | KLIO       | 1.225    | 0.731 | -1.829  | 4.279  |
|       | NC7LC      | 8.466*   | 0.000 | 5.411   | 11.521 |
|       | NIKI       | 1.485    | 0.567 | -1.569  | 4.539  |
|       | VE9        | -2.828   | 0.074 | -5.883  | 0.226  |
| NC7LC | Burley 21E | 0.111    | 1.000 | -2.943  | 3.166  |
|       | KLIO       | -7.241*  | 0.000 | -10.296 | -4.186 |
|       | NC297      | -8.466*  | 0.000 | -11.521 | -5.411 |
|       | NIKI       | -6.981*  | 0.000 | -10.036 | -3.926 |
|       | VE9        | -11.295* | 0.000 | -14.349 | -8.240 |
| NIKI  | Burley 21E | 7.093*   | 0.000 | 4.038   | 10.148 |
|       | KLIO       | -0.260   | 1.000 | -3.314  | 2.794  |
|       | NC297      | -1.485   | 0.567 | -4.539  | 1.569  |
|       | NC7LC      | 6.981*   | 0.000 | 3.926   | 10.036 |
|       | VE9        | -4.313*  | 0.006 | -7.368  | -1.258 |
| VE9   | Burley 21E | 11.406*  | 0.000 | 8.351   | 14.461 |
|       | KLIO       | 4.053*   | 0.009 | 0.998   | 7.108  |
|       | NC297      | 2.828    | 0.074 | -0.226  | 5.883  |
|       | NC7LC      | 11.295*  | 0.000 | 8.240   | 14.349 |
|       | NIKI       | 4.313*   | 0.006 | 1.258   | 7.368  |

(B)

| Variety    | N | Subset |        |        |
|------------|---|--------|--------|--------|
|            |   | 1      | 2      | 3      |
| Burley 21E | 6 | 3.378  |        |        |
| NC7LC      | 6 | 3.490  |        |        |
| NIKI       | 6 |        | 10.471 |        |
| KLIO       | 6 |        | 10.731 |        |
| NC297      | 6 |        | 11.956 | 11.956 |
| VE9        | 6 |        |        | 14.785 |
| p-value    |   | 1.000  | 0.567  | 0.074  |
